# Supplementary material
Source: Research Square preprint supplement (doi:10.21203/rs.3.rs-8946893/v1)
Supplement: Supplementary file 1 [file 456b043346d4d0e7fb9d378f.docx]

**Supplementary Table 3.** Estimated mean difference between different therapies and active surveillance for the overall cohort.

| **Outcome** | **FT - AS** | ***P*** | **RP - AS** | ***P*** | **RT - AS** | ***P*** |
| --- | --- | --- | --- | --- | --- | --- |
| **Urinary incontinence** |  |  |  |  |  |  |
| At baseline | -0.59 (-6.9 to 5.7) | 0.9 | 1.3 (-3.2 to 5.9) | 0.6 | 1.8 (-2.9 to 6.4) | 0.5 |
| At 1 year | 0.014 (-6.6 to 6.6) | >0.9 | **-19 (-24 to -14)** | **<0.001** | -1.2 (-6.2 to 3.8) | 0.6 |
| At 2 years | 1.4 (-5.8 to 8.7) | 0.7 | **-16 (-22 to -11)** | **<0.001** | 0.31 (-5.2 to 5.8) | 0.9 |
| At 3 years | 2.3 (-5.5 to 10) | 0.6 | **-16 (-22 to -10)** | **<0.001** | -1.2 (-7.1 to 4.7) | 0.7 |
| At 4 years | -0.73 (-9.4 to 8.0) | 0.9 | **-19 (-25 to -12)** | **<0.001** | -1.1 (-7.9 to 5.6) | 0.7 |
| At 5 years | 4.1 (-6.9 to 15) | 0.5 | **-15 (-22 to -7.1)** | **<0.001** | 4.4 (-3.7 to 12) | 0.3 |
| **Urinary irritative/ obstructive symptoms** |  |  |  |  |  |  |
| At baseline | -5.8 (-11 to -1.1) | 0.016 | -2.2 (-5.6 to 1.2) | 0.2 | -1.1 (-4.6 to 2.4) | 0.5 |
| At 1 year | -1.2 (-6.1 to 3.7) | 0.6 | 1.2 (-2.4 to 4.9) | 0.5 | -3.0 (-6.7 to 0.73) | 0.12 |
| At 2 years | -1.9 (-7.4 to 3.6) | 0.5 | 0.60 (-3.4 to 4.6) | 0.8 | -1.9 (-6.0 to 2.2) | 0.4 |
| At 3 years | 0.43 (-5.4 to 6.3) | 0.9 | 2.4 (-2.0 to 6.8) | 0.3 | -0.86 (-5.4 to 3.7) | 0.7 |
| At 4 years | -1.7 (-8.4 to 5.1) | 0.6 | -0.65 (-5.7 to 4.4) | 0.8 | -0.55 (-5.8 to 4.7) | 0.8 |
| At 5 years | 0.26 (-8.4 to 8.9) | >0.9 | 1.2 (-4.8 to 7.2) | 0.7 | 2.8 (-3.6 to 9.1) | 0.4 |
| **Bowel function** |  |  |  |  |  |  |
| At baseline | -5.3 (-9.7 to -0.81) | 0.021 | -2.2 (-5.4 to 1.0) | 0.18 | -1.6 (-4.9 to 1.6) | 0.3 |
| At 1 year | -1.2 (-5.8 to 3.5) | 0.6 | -0.59 (-4.1 to 2.9) | 0.7 | **-7.8 (-11 to -4.3)** | **<0.001** |
| At 2 years | -1.7 (-6.9 to 3.5) | 0.5 | -0.74 (-4.6 to 3.1) | 0.7 | **-10 (-14 to -6.2)** | **<0.001** |
| At 3 years | -5.3 (-11 to 0.31) | 0.064 | -2.6 (-6.7 to 1.6) | 0.2 | **-9.3 (-14 to -5.1)** | **<0.001** |
| At 4 years | -0.40 (-6.8 to 6.0) | 0.9 | 0.59 (-4.2 to 5.3) | 0.8 | -2.6 (-7.5 to 2.3) | 0.3 |
| At 5 years | 1.7 (-6.5 to 9.8) | 0.7 | -1.2 (-6.8 to 4.4) | 0.7 | -2.6 (-8.5 to 3.4) | 0.4 |
| **Sexual function** |  |  |  |  |  |  |
| At baseline | -5.5 (-12 to 0.94) | 0.095 | -0.73 (-5.4 to 4.0) | 0.8 | -4.1 (-8.9 to 0.64) | 0.090 |
| At 1 year | -5.9 (-12 to 0.45) | 0.069 | **-22 (-26 to -17)** | **<0.001** | **-15 (-20 to -9.7)** | **<0.001** |
| At 2 years | -5.5 (-13 to 1.5) | 0.13 | **-18 (-23 to -12)** | **<0.001** | **-12 (-17 to -6.6)** | **<0.001** |
| At 3 years | 4.2 (-3.3 to 12) | 0.3 | **-11 (-17 to -5.4)** | **<0.001** | -5.4 (-11 to 0.40) | 0.068 |
| At 4 years | 4.7 (-3.8 to 13) | 0.3 | **-7.8 (-14 to -1.4)** | **0.016** | -0.83 (-7.4 to 5.8) | 0.8 |
| At 5 years | -2.4 (-13 to 8.2) | 0.7 | **-12 (-20 to -5.0)** | **0.001** | -3.2 (-11 to 4.6) | 0.4 |
| **Hormonal effect** |  |  |  |  |  |  |
| At baseline | -1.6 (-5.6 to 2.4) | 0.4 | -0.93 (-3.8 to 1.9) | 0.5 | -1.1 (-4.0 to 1.8) | 0.5 |
| At 1 year | 0.38 (-3.8 to 4.5) | 0.9 | -0.95 (-4.0 to 2.1) | 0.5 | **-7.1 (-10 to -3.9)** | **<0.001** |
| At 2 years | -0.52 (-5.2 to 4.1) | 0.8 | -0.82 (-4.2 to 2.6) | 0.6 | **-7.3 (-11 to -3.8)** | **<0.001** |
| At 3 years | -0.94 (-5.9 to 4.0) | 0.7 | -1.9 (-5.6 to 1.8) | 0.3 | **-6.5 (-10 to -2.7)** | **<0.001** |
| At 4 years | 1.3 (-4.4 to 7.1) | 0.6 | 0.55 (-3.7 to 4.8) | 0.8 | -1.1 (-5.5 to 3.3) | 0.6 |
| At 5 years | 4.3 (-2.9 to 12) | 0.2 | 2.5 (-2.5 to 7.5) | 0.3 | 0.57 (-4.7 to 5.9) | 0.8 |

Mean changes were estimated from linear mixed models, with treatment group, follow-up time, baseline age, BMI, CCI, and treatment-time interaction included as fixed effects. Random intercepts were also included to handle patient-specific heterogeneities.
