# Supplementary material
Source: Research Square preprint supplement (doi:10.21203/rs.3.rs-8946893/v1)
Supplement: Supplementary file 2 [file 6c4c77a0467ccbd747c1d62b.docx]

**Supplementary Table 1.** Estimated marginal means for the low risk group.

| **Outcome** | **AS** | **FT** | **RP** | **RT** |
| --- | --- | --- | --- | --- |
| **Urinary incontinence** |  |  |  |  |
| At baseline | 90 (85 to 94) | 91 (81 to 101) | 87 (82 to 93) | 95 (88 to 102) |
| At 1 year | 88 (83 to 92) | 93 (83 to 103) | 71 (66 to 76) | 87 (80 to 94) |
| At 2 years | 84 (79 to 89) | 92 (81 to 103) | 69 (63 to 74) | 78 (71 to 85) |
| At 3 years | 84 (78 to 90) | 87 (75 to 99) | 70 (64 to 76) | 74 (65 to 83) |
| At 4 years | 83 (77 to 90) | 85 (73 to 97) | 68 (62 to 74) | 72 (63 to 82) |
| At 5 years | 81 (74 to 88) | 94 (74 to 113) | 68 (61 to 75) | 82 (70 to 94) |
| **Urinary irritative / obstructive symptoms** |  |  |  |  |
| At baseline | 86 (83 to 90) | 82 (75 to 90) | 83 (80 to 87) | 86 (81 to 91) |
| At 1 year | 81 (78 to 85) | 86 (79 to 93) | 85 (81 to 88) | 77 (72 to 82) |
| At 2 years | 83 (79 to 86) | 85 (77 to 93) | 85 (81 to 89) | 79 (73 to 84) |
| At 3 years | 82 (78 to 86) | 83 (75 to 92) | 85 (81 to 90) | 77 (70 to 84) |
| At 4 years | 83 (78 to 88) | 82 (73 to 91) | 83 (79 to 88) | 75 (68 to 82) |
| At 5 years | 80 (75 to 86) | 81 (66 to 96) | 86 (81 to 92) | 84 (75 to 93) |
| **Bowel function** |  |  |  |  |
| At baseline | 95 (92 to 98) | 91 (84 to 97) | 94 (91 to 97) | 95 (90 to 99) |
| At 1 year | 90 (87 to 93) | 92 (85 to 99) | 90 (87 to 93) | 82 (77 to 87) |
| At 2 years | 89 (86 to 93) | 90 (82 to 97) | 91 (87 to 94) | 77 (72 to 82) |
| At 3 years | 91 (87 to 95) | 86 (79 to 94) | 88 (84 to 92) | 77 (71 to 83) |
| At 4 years | 88 (84 to 93) | 85 (76 to 93) | 87 (83 to 91) | 79 (72 to 85) |
| At 5 years | 89 (84 to 94) | 89 (76 to 103) | 89 (84 to 94) | 87 (79 to 95) |
| **Sexual function** |  |  |  |  |
| At baseline | 50 (45 to 55) | 38 (26 to 49) | 45 (39 to 50) | 51 (44 to 59) |
| At 1 year | 44 (39 to 49) | 32 (21 to 43) | 26 (20 to 31) | 35 (28 to 43) |
| At 2 years | 40 (34 to 46) | 27 (15 to 38) | 22 (16 to 28) | 36 (28 to 44) |
| At 3 years | 33 (27 to 40) | 34 (22 to 47) | 24 (17 to 30) | 32 (22 to 42) |
| At 4 years | 29 (22 to 37) | 26 (13 to 40) | 21 (14 to 27) | 25 (14 to 35) |
| At 5 years | 33 (25 to 41) | 33 (11 to 54) | 23 (15 to 30) | 24 (11 to 37) |
| **Hormonal effect** |  |  |  |  |
| At baseline | 96 (93 to 98) | 96 (90 to 102) | 92 (89 to 95) | 95 (92 to 99) |
| At 1 year | 94 (91 to 97) | 96 (91 to 102) | 92 (89 to 95) | 88 (84 to 92) |
| At 2 years | 93 (90 to 96) | 93 (87 to 99) | 91 (88 to 95) | 87 (83 to 91) |
| At 3 years | 93 (90 to 97) | 94 (88 to 101) | 89 (86 to 93) | 89 (84 to 94) |
| At 4 years | 91 (87 to 95) | 90 (83 to 97) | 88 (84 to 92) | 88 (83 to 94) |
| At 5 years | 91 (87 to 96) | 102 (90 to 114) | 92 (88 to 96) | 91 (84 to 98) |
