# Supplementary material
Source: Research Square preprint supplement (doi:10.21203/rs.3.rs-8946893/v1)
Supplement: Supplementary file 3 [file 6d841ee882939373c74032a3.docx]

**Supplementary Table 2.** Estimated marginal means for the intermediate risk group.

| **Outcome** | **FT** | **RP** | **RT** |
| --- | --- | --- | --- |
| **Urinary incontinence** |  |  |  |
| At baseline | 88 (82 to 94) | 91 (88 to 94) | 90 (86 to 93) |
| At 1 year | 84 (78 to 90) | 66 (62 to 69) | 86 (83 to 90) |
| At 2 years | 82 (75 to 89) | 66 (63 to 70) | 84 (80 to 88) |
| At 3 years | 85 (77 to 92) | 68 (64 to 73) | 81 (76 to 85) |
| At 4 years | 83 (74 to 92) | 67 (62 to 72) | 80 (74 to 86) |
| At 5 years | 84 (74 to 95) | 68 (62 to 74) | 83 (75 to 92) |
| **Urinary irritative / obstructive symptoms** |  |  |  |
| At baseline | 80 (76 to 84) | 84 (81 to 86) | 86 (83 to 88) |
| At 1 year | 80 (76 to 85) | 83 (81 to 86) | 81 (78 to 84) |
| At 2 years | 80 (75 to 85) | 84 (81 to 87) | 82 (79 to 85) |
| At 3 years | 83 (78 to 89) | 85 (82 to 88) | 82 (78 to 85) |
| At 4 years | 83 (77 to 90) | 85 (82 to 89) | 83 (79 to 88) |
| At 5 years | 84 (75 to 92) | 86 (81 to 90) | 83 (76 to 89) |
| **Bowel function** |  |  |  |
| At baseline | 92 (87 to 96) | 93 (91 to 96) | 93 (90 to 95) |
| At 1 year | 88 (84 to 93) | 89 (87 to 92) | 84 (81 to 87) |
| At 2 years | 88 (83 to 93) | 89 (86 to 91) | 82 (79 to 86) |
| At 3 years | 86 (81 to 92) | 89 (86 to 93) | 84 (80 to 87) |
| At 4 years | 90 (84 to 96) | 90 (87 to 94) | 83 (79 to 88) |
| At 5 years | 90 (83 to 98) | 87 (83 to 91) | 87 (81 to 93) |
| **Sexual function** |  |  |  |
| At baseline | 48 (42 to 53) | 47 (44 to 51) | 45 (41 to 49) |
| At 1 year | 38 (32 to 44) | 18 (14 to 21) | 26 (22 to 29) |
| At 2 years | 36 (29 to 42) | 20 (16 to 23) | 27 (23 to 32) |
| At 3 years | 36 (30 to 43) | 19 (15 to 23) | 27 (22 to 32) |
| At 4 years | 35 (26 to 43) | 19 (14 to 23) | 26 (20 to 32) |
| At 5 years | 30 (20 to 40) | 18 (13 to 24) | 26 (18 to 34) |
| **Hormonal effect** |  |  |  |
| At baseline | 92 (88 to 95) | 93 (91 to 95) | 93 (91 to 95) |
| At 1 year | 92 (88 to 96) | 91 (89 to 93) | 86 (83 to 88) |
| At 2 years | 92 (88 to 96) | 93 (90 to 95) | 88 (85 to 91) |
| At 3 years | 91 (87 to 96) | 92 (89 to 94) | 88 (85 to 91) |
| At 4 years | 93 (87 to 98) | 93 (90 to 96) | 91 (87 to 95) |
| At 5 years | 92 (86 to 99) | 92 (88 to 96) | 87 (81 to 92) |
